# Supplementary material
Source: PubMed Central journal article supplement (PMC8122495)
Supplement: NIHMS1696675-supplement-Table_1.pdf [file NIHMS1696675-supplement-Table_1.pdf]

|                             | Weight (g) |       |       |       |       |       |       |        |        |        |
|-----------------------------|------------|-------|-------|-------|-------|-------|-------|--------|--------|--------|
|                             | Day 0      | Day 1 | Day 2 | Day 3 | Day 4 | Day 5 | Day 8 | Day 11 | Day 17 | Day 19 |
| <b>Wild Type Vehicle 1</b>  | 33.73      | 33.34 | 33.13 | 33.71 | 34.56 | 33.63 | 33.38 | 33.35  | 33.53  | 33.45  |
| <b>Wild Type Vehicle 2</b>  | 31.96      | 32.31 | 32.26 | 32.82 | 33.23 | 32.87 | 32.92 | 33.17  | 33.51  | 33.04  |
| <b>Wild Type Vehicle 3</b>  | 28.66      | 28.35 | 28.35 | 28.66 | 29.26 | 29.05 | 28.59 | 29.61  | 29.32  | 29.24  |
| <b>Wild Type Vehicle 4</b>  | 33.53      | 32.62 | 33.05 | 32.38 | 33.56 | 33.41 | 33.6  | 33.63  | 33.73  | 33.16  |
| <b>Wild Type Vehicle 5</b>  | 31.28      | 31.5  | 31.43 | 31.05 | 30.98 | 30.52 | 31.09 | 31.16  | 31.07  | 30.49  |
| <b>Wild Type Vehicle 6</b>  | 34.29      | 33.7  | 33.04 | 32.97 | 32.93 | 32.43 | 33.34 | 33.03  | 33.52  | 32.65  |
| <b>Wild Type Vehicle 7</b>  | 33.81      | 33.51 | 33.15 | 32.36 | 32.66 | 32.25 | 32.66 | 32.8   | 33.39  | 32.5   |
| <b>Wild Type Vehicle 8</b>  | 30.96      | 30.93 | 30.66 | 30.35 | 30.99 | 30.54 | 31.12 | 30.7   | 31.39  | 30.95  |
| <b>Wild Type Vehicle 9</b>  | 35.85      | 35.28 | 34.9  | 34.44 | 34.36 | 34.43 | 34.4  | 34.33  | 34.64  | 34.72  |
| <b>Wild Type DSS 1</b>      | 34.13      | 34.4  | 33.98 | 33.33 | 32.02 | 30.26 | 26.45 | 26.34  | 25.99  | 26.67  |
| <b>Wild Type DSS 2</b>      | 37.17      | 36.52 | 36.51 | 35.87 | 34.11 | 32.7  | 32.73 | 33.2   | 35.42  | 35.02  |
| <b>Wild Type DSS 3</b>      | 36.28      | 36.15 | 36.01 | 35.52 | 34.81 | 33.9  | 31.9  | 32.51  | 31.35  | 30.6   |
| <b>Wild Type DSS 4</b>      | 37.24      | 36.53 | 35.7  | 35.71 | 34.75 | 34.85 | 35.41 | 34.42  | 35.34  | 34.6   |
| <b>Wild Type DSS 5</b>      | 33.56      | 33.7  | 33.53 | 32.93 | 32.01 | 30.6  | 30.44 | 31.29  | 30.51  | 30.57  |
| <b>Wild Type DSS 6</b>      | 30.94      | 31.12 | 30.55 | 30.51 | 30.14 | 29.41 | 29.48 | 29.41  | 29.84  | 30.4   |
| <b>Wild Type DSS 7</b>      | 30.82      | 31.05 | 30.81 | 30.55 | 29.71 | 29.29 | 29.28 | 30.4   | 31.04  | 31.05  |
| <b>Wild Type DSS 8</b>      | 30.53      | 30.41 | 30.08 | 29.55 | 29.01 | 27.6  | 26.85 | 26.88  | 28.4   | 28.3   |
| <b>Wild Type DSS 9</b>      | 33.32      | 33.31 | 32.8  | 32.82 | 31.23 | 29.26 | 28.18 | 29.71  | 30.37  | 31.05  |
| <b>AppNL-G-F Vehicle 1</b>  | 34.14      | 33.74 | 34.16 | 33.93 | 34.24 | 34.23 | 34.32 | 34.04  | 33.81  | 34.12  |
| <b>AppNL-G-F Vehicle 2</b>  | 43.3       | 43.73 | 42.3  | 42.32 | 42.8  | 43.23 | 43.07 | 43.73  | 43.6   | 44.81  |
| <b>AppNL-G-F Vehicle 3</b>  | 40.38      | 40.24 | 40.35 | 40.62 | 39.91 | 39.92 | 40.72 | 40.55  | 40.42  | 40.43  |
| <b>AppNL-G-F Vehicle 4</b>  | 46.9       | 46.94 | 46.63 | 46.33 | 46.66 | 46.85 | 47.3  | 46.92  | 48.05  | 47.81  |
| <b>AppNL-G-F Vehicle 5</b>  | 29.5       | 28.76 | 28.91 | 28.45 | 28.77 | 29.53 | 28.95 | 29.28  | 29.21  | 28.99  |
| <b>AppNL-G-F Vehicle 6</b>  | 36.68      | 36.56 | 36.63 | 35.95 | 36.68 | 36.21 | 36.98 | 36.2   | 36.39  | 36.81  |
| <b>AppNL-G-F Vehicle 7</b>  | 41.98      | 42.6  | 42.82 | 41.88 | 41.98 | 41.84 | 42.74 | 41.92  | 41.95  | 42.5   |
| <b>AppNL-G-F Vehicle 8</b>  | 34.05      | 34.34 | 34.33 | 34.17 | 34.42 | 34.18 | 35.04 | 35.02  | 35.03  | 34.82  |
| <b>AppNL-G-F Vehicle 9</b>  | 30.53      | 31.22 | 30.71 | 30.6  | 30.87 | 31.13 | 31.59 | 31.53  | 31.6   | 31.4   |
| <b>AppNL-G-F Vehicle 10</b> | 36.42      | 36.6  | 36.24 | 35.93 | 36.69 | 36.51 | 37.12 | 37.53  | 36.8   | 36.46  |
| <b>AppNL-G-F DSS 1</b>      | 34.5       | 35.55 | 34.48 | 34.22 | 34.44 | 33.51 | 33.99 | 34.13  | 35.15  | 34.54  |
| <b>AppNL-G-F DSS 2</b>      | 34.24      | 33.84 | 33.8  | 32.41 | 31.13 | 29.82 | 30.45 | 31.66  | 33.61  | 33.3   |
| <b>AppNL-G-F DSS 3</b>      | 33.85      | 34.32 | 34.32 | 34.08 | 34.05 | 33.46 | 33.76 | 33.93  | 34.3   | 34.02  |
| <b>AppNL-G-F DSS 4</b>      | 33.76      | 34.38 | 34.31 | 33.75 | 32.72 | 31.64 | 31.84 | 32.62  | 32.5   | 32.53  |
| <b>AppNL-G-F DSS 5</b>      | 37.5       | 38.16 | 37.63 | 35.98 | 33.91 | 32.32 | 30.7  | 31.3   | 31.88  | 31.21  |
| <b>AppNL-G-F DSS 6</b>      | 36.44      | 36.44 | 36.72 | 36.05 | 33.85 | 31.99 | 31.56 | 32.22  | 31.04  | 31.1   |
| <b>AppNL-G-F DSS 7</b>      | 43.84      | 43.44 | 42.8  | 41.21 | 39.6  | 37.43 | 32.4  | 32.33  | 29.92  | 30.81  |
| <b>AppNL-G-F DSS 8</b>      | 33.06      | 33.33 | 33.33 | 32.93 | 32.48 | 31.86 | 31.95 | 31.82  | 32.43  | 31.93  |
| <b>AppNL-G-F DSS 9</b>      | 33.48      | 33.4  | 33.65 | 33.87 | 32.54 | 31.57 | 32.66 | 32.02  | 32.33  | 32.67  |
| <b>AppNL-G-F DSS 10</b>     | 36.92      | 37.43 | 36.64 | 36.32 | 35.53 | 33.96 | 33.56 | 34.62  | 35.95  | 36.17  |
